# Supplementary material for: Real-World Modifications of Renin-Angiotensin-Aldosterone System Inhibitors in Patients with Hyperkalemia Initiating Sodium Zirconium Cyclosilicate Therapy: The OPTIMIZE I Study
Source: PubMed Central journal article supplement — Adv Ther. 2023 May 4;40(6):2886–901. doi: 10.1007/s12325-023-02518-w (PMC10220114; doi:10.1007/s12325-023-02518-w), 2023-05-04
Supplement: 12325_2023_2518_MOESM1_ESM.pdf [file 12325_2023_2518_MOESM1_ESM.pdf]

## SUPPLEMENTARY MATERIALS

### Real-World Modifications of Renin-Angiotensin-Aldosterone System Inhibitors in Patients with Hyperkalemia Initiating Sodium Zirconium Cyclosilicate Therapy: The OPTIMIZE I Study

#### Authors:

Abiy Agiro,<sup>1\*</sup> [abiy.agiro@astrazeneca.com](mailto:abiy.agiro@astrazeneca.com)  
Alpesh Amin,<sup>2</sup> [anamin@hs.uci.edu](mailto:anamin@hs.uci.edu)  
Erin E. Cook,<sup>3</sup> [Erin.cook@analysisgroup.com](mailto:Erin.cook@analysisgroup.com)  
Fan Mu,<sup>3</sup> [fan.mu@analysisgroup.com](mailto:fan.mu@analysisgroup.com)  
Jingyi Chen,<sup>3</sup> [Jingyi.chen@analysisgroup.com](mailto:Jingyi.chen@analysisgroup.com)  
Pooja Desai,<sup>1</sup> [pooja.desai@astrazeneca.com](mailto:pooja.desai@astrazeneca.com)  
Yemmie Oluwatosin,<sup>1</sup> [yosolajes@gmail.com](mailto:yosolajes@gmail.com)  
Charles V. Pollack, Jr,<sup>4</sup> [cvpollack@gmail.com](mailto:cvpollack@gmail.com)

#### Affiliations:

<sup>1</sup>AstraZeneca, 1800 Concord Pike, Wilmington, DE 19850, United States

<sup>2</sup>University of California Irvine, Irvine, CA 92697, United States

<sup>3</sup>Analysis Group, Inc., 111 Huntington Ave, 14<sup>th</sup> Floor, Boston, MA 02199, United States

<sup>4</sup>University of Mississippi, Jackson, MS 38677, United States

#### \*Corresponding author:

Abiy Agiro  
Astra Zeneca, US Medical Affairs  
1800 Concord Pike, Wilmington, DE 19850  
Tel: 302-886-1898  
[abiy.agiro@astrazeneca.com](mailto:abiy.agiro@astrazeneca.com)

**Supplementary Table 1. RAASi Modifications After SZC Initiation Among Additional Subgroups**

| Sample                           | N   | Optimized dose             |                      | Non-optimized dose         |                      |
|----------------------------------|-----|----------------------------|----------------------|----------------------------|----------------------|
|                                  |     | Maintained same RAASi dose | Increased RAASi dose | Discontinued RAASi therapy | Decreased RAASi dose |
| Stage 3 CKD <sup>1</sup>         | 171 | 118 (69.0%)                | 19 (11.1%)           | 23 (13.5%)                 | 11 (6.4%)            |
| Stage 4 CKD <sup>1</sup>         | 174 | 121 (69.5%)                | 12 (6.9%)            | 31 (17.8%)                 | 10 (5.7%)            |
| Stage 5 CKD <sup>1</sup>         | 33  | 24 (72.7%)                 | 2 (6.1%)             | 4 (12.1%)                  | 3 (9.1%)             |
| Stage 5 CKD or ESKD <sup>2</sup> | 150 | 106 (70.7%)                | 6 (4.0%)             | 30 (20.0%)                 | 8 (5.3%)             |
| ESKD <sup>3</sup>                | 117 | 82 (70.1%)                 | 4 (3.4%)             | 26 (22.2%)                 | 5 (4.3%)             |
| HF                               | 149 | 95 (63.8%)                 | 19 (12.8%)           | 29 (19.5%)                 | 6 (4.0%)             |
| Hypertension                     | 538 | 376 (69.9%)                | 40 (7.4%)            | 92 (17.1%)                 | 30 (5.6%)            |

Abbreviations: CKD, chronic kidney disease; ESKD, end-stage kidney disease; HF, heart failure; RAASi, renin-angiotensin-aldosterone system inhibitors; SZC, sodium zirconium cyclosilicate

<sup>1</sup>CKD Stage 3-5 was assessed using ICD-10 diagnosis codes.

<sup>2</sup>Stage 5 CKD or ESKD includes all patients with either Stage 5 CKD or ESKD.

<sup>3</sup> ESKD was assessed using ICD-10 diagnosis codes for ESKD or an ICD-10 diagnosis code for CKD stage 5 + a code for dialysis.

**Supplementary Table 2. Baseline Characteristics of Patients Without ESKD Initiating SZC<sup>1</sup>**

|                                        | All patients<br>(N=472) | Optimized<br>RAASi <sup>2</sup><br>(N=370) | Did not<br>optimize<br>RAASi <sup>3</sup><br>(N=102) | p-value |
|----------------------------------------|-------------------------|--------------------------------------------|------------------------------------------------------|---------|
| <b>Demographics</b>                    |                         |                                            |                                                      |         |
| Age on index date (years), mean ± SD   | 62.36 ± 12.60           | 62.03 ± 12.60                              | 63.54 ± 12.58                                        | 0.39    |
| Female gender, n (%)                   | 162 (34.3%)             | 136 (36.8%)                                | 26 (25.5%)                                           | < 0.05* |
| Claims payer, n (%)                    |                         |                                            |                                                      | 0.14    |
| Commercial or unknown                  | 218 (46.2%)             | 175 (47.3%)                                | 43 (42.2%)                                           |         |
| Medicaid                               | 102 (21.6%)             | 84 (22.7%)                                 | 18 (17.6%)                                           |         |
| Medicare Advantage                     | 152 (32.2%)             | 111 (30.0%)                                | 41 (40.2%)                                           |         |
| Region, n (%)                          |                         |                                            |                                                      | 0.78    |
| Midwest                                | 62 (13.1%)              | 50 (13.5%)                                 | 12 (11.8%)                                           |         |
| Northeast                              | 117 (24.8%)             | 89 (24.1%)                                 | 28 (27.5%)                                           |         |
| South                                  | 169 (35.8%)             | 135 (36.5%)                                | 34 (33.3%)                                           |         |
| West                                   | 119 (25.2%)             | 91 (24.6%)                                 | 28 (27.5%)                                           |         |
| Other                                  | 5 (1.1%)                | 5 (1.4%)                                   | 0 (0.0%)                                             |         |
| <b>HK</b>                              |                         |                                            |                                                      |         |
| HK diagnosis, n (%)                    | 291 (61.7%)             | 221 (59.7%)                                | 70 (68.6%)                                           | 0.13    |
| <b>Comorbidities, n (%)</b>            |                         |                                            |                                                      |         |
| CKD stages 3-5                         | 398 (84.3%)             | 314 (84.9%)                                | 84 (82.4%)                                           | 0.64    |
| Congestive heart failure               | 101 (21.4%)             | 80 (21.6%)                                 | 21 (20.6%)                                           | 0.93    |
| Coronary artery disease                | 122 (25.8%)             | 92 (24.9%)                                 | 30 (29.4%)                                           | 0.42    |
| Diabetes                               | 336 (71.2%)             | 263 (71.1%)                                | 73 (71.6%)                                           | 1.00    |
| Hypertension                           | 427 (90.5%)             | 336 (90.8%)                                | 91 (89.2%)                                           | 0.77    |
| <b>Prior Treatment, n (%)</b>          |                         |                                            |                                                      |         |
| <b>HK treatments</b>                   |                         |                                            |                                                      |         |
| Patiromer                              | 88 (18.6%)              | 70 (18.9%)                                 | 18 (17.6%)                                           | 0.88    |
| Sodium polystyrene sulfonate           | 77 (16.3%)              | 55 (14.9%)                                 | 22 (21.6%)                                           | 0.14    |
| Loop diuretics                         | 201 (42.6%)             | 153 (41.4%)                                | 48 (47.1%)                                           | 0.36    |
| Thiazides and thiazide-like diuretics  | 88 (18.6%)              | 69 (18.6%)                                 | 19 (18.6%)                                           | 1.00    |
| <b>Other treatments</b>                |                         |                                            |                                                      |         |
| Beta blockers                          | 281 (59.5%)             | 220 (59.5%)                                | 61 (59.8%)                                           | 1.00    |
| NSAIDs                                 | 40 (8.5%)               | 33 (8.9%)                                  | 7 (6.9%)                                             | 0.65    |
| <b>All-Cause HRU</b>                   |                         |                                            |                                                      |         |
| Any inpatient stays, n (%)             | 103 (21.8%)             | 76 (20.5%)                                 | 27 (26.5%)                                           | 0.25    |
| Number of inpatient stays, mean ± SD   | 0.37 ± 0.88             | 0.33 ± 0.78                                | 0.51 ± 1.16                                          | 0.18    |
| Any ED visits, n (%)                   | 128 (27.1%)             | 91 (24.6%)                                 | 37 (36.3%)                                           | < 0.05* |
| Number of ED visits, mean ± SD         | 0.41 ± 0.87             | 0.36 ± 0.84                                | 0.59 ± 0.97                                          | < 0.05* |
| Any outpatient visits, n (%)           | 434 (91.9%)             | 344 (93.0%)                                | 90 (88.2%)                                           | 0.18    |
| Number of outpatient visits, mean ± SD | 13.38 ± 14.75           | 12.98 ± 13.59                              | 14.85 ± 18.35                                        | 0.53    |

Abbreviations: CKD, chronic kidney disease; ED, emergency department; ESKD, end-stage kidney disease; HK, hyperkalemia; HRU, healthcare resource utilization; NSAID, non-steroidal anti-inflammatory drug; SD, standard deviation; SZC, sodium zirconium cyclosilicate

<sup>1</sup>Baseline was the 6-month period prior to the initiation of SZC

<sup>2</sup>Optimized RAASi included patients with the same dose or with an up-titration

<sup>3</sup>Non-optimized RAASi included patients who discontinued or with a down-titration

**Supplemental Table 3. Baseline Characteristics of Patients With CKD Initiating SZC<sup>1</sup>**

|                                        | All patients<br>(N=398) | Optimized<br>RAASi <sup>2</sup><br>(N=314) | Did not<br>optimize<br>RAASi <sup>3</sup><br>(N=84) | p-value |
|----------------------------------------|-------------------------|--------------------------------------------|-----------------------------------------------------|---------|
| <b>Demographics</b>                    |                         |                                            |                                                     |         |
| Age on index date (years), mean ± SD   | 62.28 ± 12.39           | 62.05 ± 12.39                              | 63.13 ± 12.42                                       | 0.54    |
| Female gender, n (%)                   | 139 (34.9%)             | 121 (38.5%)                                | 18 (21.4%)                                          | < 0.01* |
| Claims payer, n (%)                    |                         |                                            |                                                     | 0.41    |
| Commercial or unknown                  | 190 (47.7%)             | 152 (48.4%)                                | 38 (45.2%)                                          |         |
| Medicaid                               | 84 (21.1%)              | 69 (22.0%)                                 | 15 (17.9%)                                          |         |
| Medicare Advantage                     | 124 (31.2%)             | 93 (29.6%)                                 | 31 (36.9%)                                          |         |
| Region, n (%)                          |                         |                                            |                                                     | 0.95    |
| Midwest                                | 55 (13.8%)              | 44 (14.0%)                                 | 11 (13.1%)                                          |         |
| Northeast                              | 90 (22.6%)              | 71 (22.6%)                                 | 19 (22.6%)                                          |         |
| South                                  | 150 (37.7%)             | 117 (37.3%)                                | 33 (39.3%)                                          |         |
| West                                   | 98 (24.6%)              | 77 (24.5%)                                 | 21 (25.0%)                                          |         |
| Other                                  | 5 (1.3%)                | 5 (1.6%)                                   | 0 (0.0%)                                            |         |
| <b>HK</b>                              |                         |                                            |                                                     |         |
| HK diagnosis, n (%)                    | 267 (67.1%)             | 204 (65.0%)                                | 63 (75.0%)                                          | 0.11    |
| <b>Comorbidities, n (%)</b>            |                         |                                            |                                                     |         |
| Congestive heart failure               | 87 (21.9%)              | 69 (22.0%)                                 | 18 (21.4%)                                          | 1.00    |
| Coronary artery disease                | 110 (27.6%)             | 81 (25.8%)                                 | 29 (34.5%)                                          | 0.15    |
| Diabetes                               | 311 (78.1%)             | 243 (77.4%)                                | 68 (81.0%)                                          | 0.58    |
| Hypertension                           | 387 (97.2%)             | 304 (96.8%)                                | 83 (98.8%)                                          | 0.47    |
| <b>Prior Treatment, n (%)</b>          |                         |                                            |                                                     |         |
| <b>HK treatments</b>                   |                         |                                            |                                                     |         |
| Patiromer                              | 73 (18.3%)              | 58 (18.5%)                                 | 15 (17.9%)                                          | 1.00    |
| Sodium polystyrene sulfonate           | 67 (16.8%)              | 50 (15.9%)                                 | 17 (20.2%)                                          | 0.44    |
| Loop diuretics                         | 176 (44.2%)             | 134 (42.7%)                                | 42 (50.0%)                                          | 0.28    |
| Thiazides and thiazide-like diuretics  | 78 (19.6%)              | 61 (19.4%)                                 | 17 (20.2%)                                          | 0.99    |
| <b>Other treatments</b>                |                         |                                            |                                                     |         |
| Beta blockers                          | 239 (60.1%)             | 185 (58.9%)                                | 54 (64.3%)                                          | 0.44    |
| NSAIDs                                 | 32 (8.0%)               | 27 (8.6%)                                  | 5 (6.0%)                                            | 0.57    |
| <b>All-Cause HRU</b>                   |                         |                                            |                                                     |         |
| Any inpatient stays, n (%)             | 94 (23.6%)              | 69 (22.0%)                                 | 25 (29.8%)                                          | 0.18    |
| Number of inpatient stays, mean ± SD   | 0.40 ± 0.92             | 0.36 ± 0.82                                | 0.56 ± 1.20                                         | 0.13    |
| Any ED visits, n (%)                   | 115 (28.9%)             | 83 (26.4%)                                 | 32 (38.1%)                                          | 0.05    |
| Number of ED visits, mean ± SD         | 0.44 ± 0.91             | 0.40 ± 0.89                                | 0.61 ± 0.98                                         | < 0.05* |
| Any outpatient visits, n (%)           | 392 (98.5%)             | 310 (98.7%)                                | 82 (97.6%)                                          | 0.61    |
| Number of outpatient visits, mean ± SD | 14.56 ± 15.01           | 13.89 ± 13.62                              | 17.04 ± 19.23                                       | 0.13    |

Abbreviations: CKD, chronic kidney disease; ED, emergency department; ESKD, end-stage kidney disease; HK, hyperkalemia; HRU, healthcare resource utilization; NSAID, non-steroidal anti-inflammatory drug; SD, standard deviation; SZC, sodium zirconium cyclosilicate

<sup>1</sup>Baseline was the 6-month period prior to the initiation of SZC

<sup>2</sup>Optimized RAASi included patients with the same dose or with an up-titration

<sup>3</sup>Non-optimized RAASi included patients who discontinued or with a down-titration

**Supplemental Table 4. Baseline Characteristics of Patients With CKD + Diabetes Initiating SZC<sup>1</sup>**

|                                        | All patients<br>(N=311) | Optimized<br>RAASi <sup>2</sup><br>(N=243) | Did not<br>optimize<br>RAASi <sup>3</sup><br>(N=68) | p-value |
|----------------------------------------|-------------------------|--------------------------------------------|-----------------------------------------------------|---------|
| <b>Demographics</b>                    |                         |                                            |                                                     |         |
| Age on index date (years), mean ± SD   | 62.69 ± 11.77           | 62.73 ± 11.66                              | 62.54 ± 12.23                                       | 0.95    |
| Female gender, n (%)                   | 110 (35.4%)             | 96 (39.5%)                                 | 14 (20.6%)                                          | < 0.01* |
| Claims payer, n (%)                    |                         |                                            |                                                     | 0.62    |
| Commercial or unknown                  | 139 (44.7%)             | 109 (44.9%)                                | 30 (44.1%)                                          |         |
| Medicaid                               | 66 (21.2%)              | 54 (22.2%)                                 | 12 (17.6%)                                          |         |
| Medicare Advantage                     | 106 (34.1%)             | 80 (32.9%)                                 | 26 (38.2%)                                          |         |
| Region, n (%)                          |                         |                                            |                                                     | 0.95    |
| Midwest                                | 41 (13.2%)              | 33 (13.6%)                                 | 8 (11.8%)                                           |         |
| Northeast                              | 71 (22.8%)              | 54 (22.2%)                                 | 17 (25.0%)                                          |         |
| South                                  | 114 (36.7%)             | 89 (36.6%)                                 | 25 (36.8%)                                          |         |
| West                                   | 81 (26.0%)              | 63 (25.9%)                                 | 18 (26.5%)                                          |         |
| Other                                  | 4 (1.3%)                | 4 (1.6%)                                   | 0 (0.0%)                                            |         |
| <b>HK</b>                              |                         |                                            |                                                     |         |
| HK diagnosis, n (%)                    | 210 (67.5%)             | 161 (66.3%)                                | 49 (72.1%)                                          | 0.45    |
| <b>Comorbidities, n (%)</b>            |                         |                                            |                                                     |         |
| Congestive heart failure               | 75 (24.1%)              | 60 (24.7%)                                 | 15 (22.1%)                                          | 0.77    |
| Coronary artery disease                | 94 (30.2%)              | 70 (28.8%)                                 | 24 (35.3%)                                          | 0.38    |
| Hypertension                           | 307 (98.7%)             | 239 (98.4%)                                | 68 (100.0%)                                         | 0.58    |
| <b>Prior Treatment, n (%)</b>          |                         |                                            |                                                     |         |
| <b>HK treatments</b>                   |                         |                                            |                                                     |         |
| Patiromer                              | 52 (16.7%)              | 40 (16.5%)                                 | 12 (17.6%)                                          | 0.96    |
| Sodium polystyrene sulfonate           | 50 (16.1%)              | 37 (15.2%)                                 | 13 (19.1%)                                          | 0.56    |
| Loop diuretics                         | 150 (48.2%)             | 114 (46.9%)                                | 36 (52.9%)                                          | 0.46    |
| Thiazides and thiazide-like diuretics  | 69 (22.2%)              | 55 (22.6%)                                 | 14 (20.6%)                                          | 0.85    |
| <b>Other treatments</b>                |                         |                                            |                                                     |         |
| Beta blockers                          | 197 (63.3%)             | 151 (62.1%)                                | 46 (67.6%)                                          | 0.49    |
| NSAIDs                                 | 27 (8.7%)               | 25 (10.3%)                                 | 2 (2.9%)                                            | 0.08    |
| <b>All-Cause HRU</b>                   |                         |                                            |                                                     |         |
| Any inpatient stays, n (%)             | 81 (26.0%)              | 61 (25.1%)                                 | 20 (29.4%)                                          | 0.58    |
| Number of inpatient stays, mean ± SD   | 0.44 ± 0.95             | 0.41 ± 0.87                                | 0.56 ± 1.19                                         | 0.42    |
| Any ED visits, n (%)                   | 92 (29.6%)              | 67 (27.6%)                                 | 25 (36.8%)                                          | 0.19    |
| Number of ED visits, mean ± SD         | 0.48 ± 0.99             | 0.44 ± 0.98                                | 0.62 ± 1.04                                         | 0.13    |
| Any outpatient visits, n (%)           | 305 (98.1%)             | 239 (98.4%)                                | 66 (97.1%)                                          | 0.62    |
| Number of outpatient visits, mean ± SD | 15.46 ± 16.24           | 14.94 ± 14.87                              | 17.34 ± 20.44                                       | 0.54    |

Abbreviations: CKD, chronic kidney disease; ED, emergency department; ESKD, end-stage kidney disease; HK, hyperkalemia; HRU, healthcare resource utilization; NSAID, non-steroidal anti-inflammatory drug; SD, standard deviation; SZC, sodium zirconium cyclosilicate

<sup>1</sup>Baseline was the 6-month period prior to the initiation of SZC

<sup>2</sup>Optimized RAASi included patients with the same dose or with an up-titration

<sup>3</sup>Non-optimized RAASi included patients who discontinued or with a down-titration

**Supplemental Table 5. RAASi Therapy at Initiation of SZC<sup>1</sup> Among Patients Without ESKD, With CKD, and With CKD + Diabetes**

|       | All patients without ESKD |                                            |                                                      |             | All patients with stage 3-5 CKD |                                            |                                                     |             | All patients with stage 3-5 CKD + Diabetes |                                            |                                                     |             |
|-------|---------------------------|--------------------------------------------|------------------------------------------------------|-------------|---------------------------------|--------------------------------------------|-----------------------------------------------------|-------------|--------------------------------------------|--------------------------------------------|-----------------------------------------------------|-------------|
|       | All patients<br>(N=472)   | Optimized<br>RAASi <sup>2</sup><br>(N=370) | Did not<br>optimize<br>RAASi <sup>3</sup><br>(N=102) | p-<br>value | All patients<br>(N=398)         | Optimized<br>RAASi <sup>2</sup><br>(N=314) | Did not<br>optimize<br>RAASi <sup>3</sup><br>(N=84) | p-<br>value | All patients<br>(N=311)                    | Optimized<br>RAASi <sup>2</sup><br>(N=243) | Did not<br>optimize<br>RAASi <sup>3</sup><br>(N=68) | p-<br>value |
| RAASi | 444<br>(94.1%)            | 349<br>(94.3%)                             | 95<br>(93.1%)                                        | 0.83        | 375<br>(94.2%)                  | 297<br>(94.6%)                             | 78<br>(92.9%)                                       | 0.73        | 293<br>(94.2%)                             | 228<br>(93.8%)                             | 65<br>(95.6%)                                       | 0.77        |
| ACEi  | 245<br>(51.9%)            | 192<br>(51.9%)                             | 53<br>(52.0%)                                        | 1.00        | 214<br>(53.8%)                  | 167<br>(53.2%)                             | 47<br>(56.0%)                                       | 0.74        | 164<br>(52.7%)                             | 124<br>(51.0%)                             | 40<br>(58.8%)                                       | 0.32        |
| ARB   | 189<br>(40.0%)            | 150<br>(40.5%)                             | 39<br>(38.2%)                                        | 0.76        | 154<br>(38.7%)                  | 125<br>(39.8%)                             | 29<br>(34.5%)                                       | 0.45        | 123<br>(39.5%)                             | 100<br>(41.2%)                             | 23<br>(33.8%)                                       | 0.34        |
| ARNI  | 19 (4.0%)                 | 15 (4.1%)                                  | 4 (3.9%)                                             | 1.00        | 12 (3.0%)                       | 9 (2.9%)                                   | 3 (3.6%)                                            | 0.72        | 11 (3.5%)                                  | 8 (3.3%)                                   | 3 (4.4%)                                            | 0.71        |
| DRI   | 1 (0.2%)                  | 1 (0.3%)                                   | 0 (0.0%)                                             | 1.00        | 0 (0.0%)                        | 0 (0.0%)                                   | 0 (0.0%)                                            | -           | 0 (0.0%)                                   | 0 (0.0%)                                   | 0 (0.0%)                                            | -           |
| MRA   | 59<br>(12.5%)             | 49 (13.2%)                                 | 10 (9.8%)                                            | 0.45        | 46<br>(11.6%)                   | 38 (12.1%)                                 | 8 (9.5%)                                            | 0.64        | 35<br>(11.3%)                              | 30 (12.3%)                                 | 5 (7.4%)                                            | 0.35        |

Abbreviations: ACEi, angiotensin-converting enzyme inhibitors; ARB, angiotensin receptor blocker; ARNI, angiotensin receptor neprilysin inhibitor; CKD, chronic kidney disease; DRI, direct renin inhibitor; ESKD, end-stage kidney disease MRA, mineralocorticoid receptor antagonist, RAASi, renin-angiotensin-aldosterone system inhibitor; RAASi, renin-angiotensin system inhibitor

<sup>1</sup>Patients could be taking monotherapy or combination therapy so the percentages may not add to 100%

<sup>2</sup>Optimized RAASi included patients with the same dose or with an up-titration

<sup>3</sup>Non-optimized RAASi included patients who discontinued or with a down-titration
